# Supplementary material for: Bacopa monnieri phytochemicals regulate fibroblast cell migration via modulation of focal adhesions
Source: PubMed Central journal article supplement (PMC10981128; doi:10.1016/j.isci.2024.109489), 2024-03-11
Supplement: mmc1.pdf [file mmc1.pdf]

**Supplemental information**

***Bacopa monnieri* phytochemicals regulate fibroblast  
cell migration via modulation of focal adhesions**

**Ravindra K. Zirmire, Dyuti Saha, Rakesh Dey, Habibu Tanimu, Rania Zaarour, Deborah Bird, Prakash Cherian, Isha Rana, Nita Roy, Aryasekhar Sanyal, Namita Misra, and Colin Jamora**

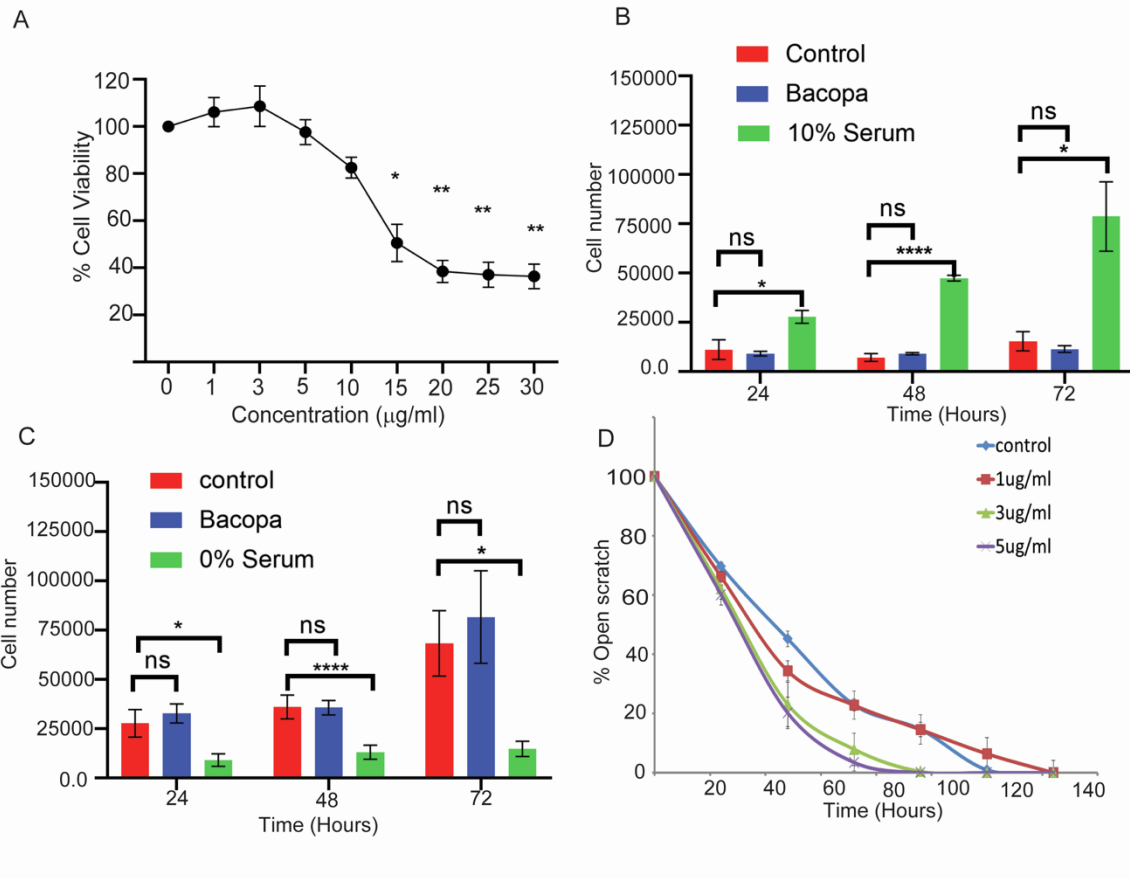

**Supplementary Figure 1. *Bacopa monnieri* extract does not affect cell proliferation rate, related to figure 1.** A) Maximum tolerable dose was determined by WST assay. B) Proliferation assay with WST after treating the cells with *Bacopa monnieri* extract or vehicle control. C) Proliferation inhibition assay with WST after treating the cells with *Bacopa monnieri* extract or vehicle control. For figures A-C, p values were calculated using one way ANOVA followed by Tukey's test. \* $p \leq 0.05$ , \*\* $p < 0.01$ , \*\*\* $p < 0.001$ , three independent biological replicates D) Scratch migration of cells in the presence of Bacopa or vehicle control (n=3 biological replicates).

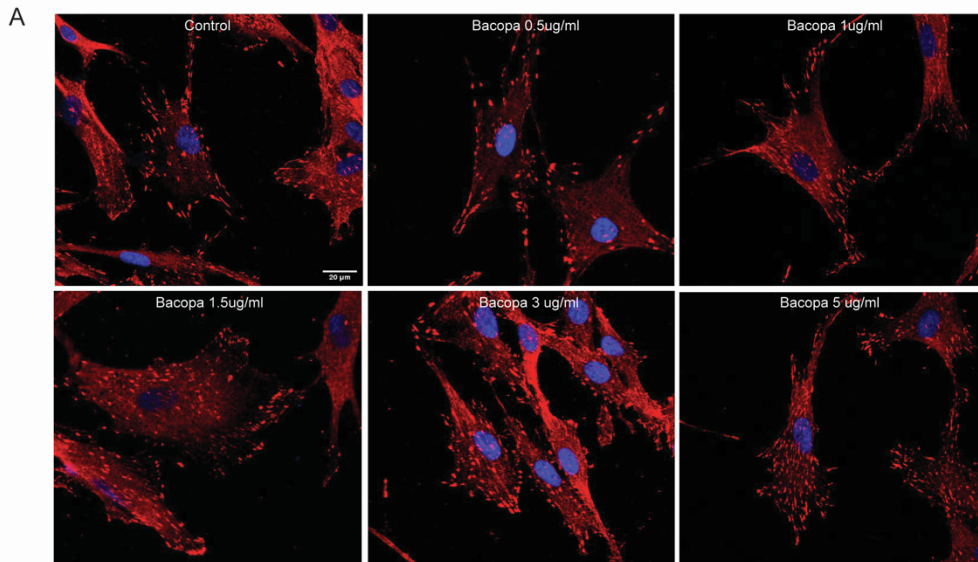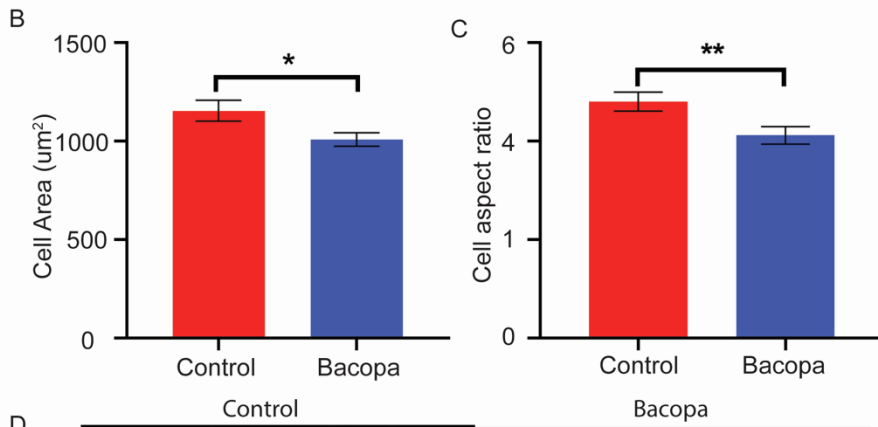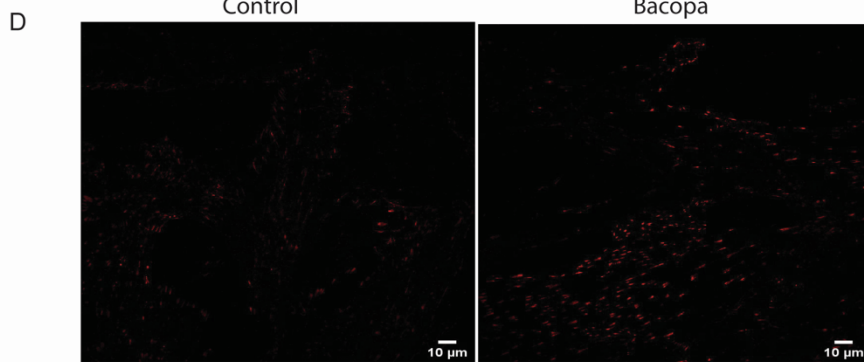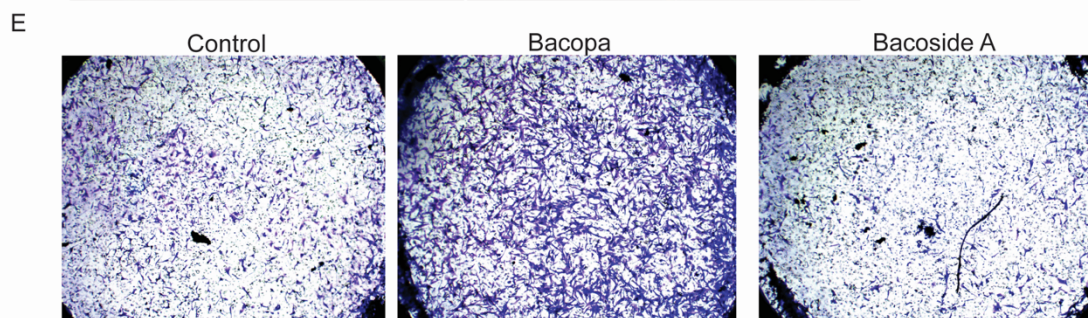

**Supplementary Figure 2. Bacopa monnieri extract activates focal adhesion kinase related to figure 2,4 and discussion** A) Immunofluorescence staining for focal adhesion marker vinculin. B) Cell area and C) shape of fibroblasts treated with *Bacopa monnieri* extract. D) Immunofluorescence staining for p-FAK in the cells treated with Bacopa monnieri extract of vehicle control. Scale bar 10 $\mu$  m. E) Transwell migration of fibroblasts treated with Bacoside A which is standard mix of purified bacoside A3, Bacoside II, jujubigenin and bacopasaponin C at 1 $\mu$ g/ml.

| Chemical                                              | %W/W | Method of Analysis    |
|-------------------------------------------------------|------|-----------------------|
| Bacoside -A3                                          | 4.5  | HPLC                  |
| Bacopaside-II                                         | 0.5  | HPLC                  |
| Bacopaside -X (jujubogenin isomer of bacopasaponin C) | 5.8  | HPLC                  |
| Bacopasaponin C                                       | 4.8  | HPLC                  |
| Bacopaside -I                                         | 5.1  | HPLC                  |
| Luteolin                                              | 0.47 | HPLC                  |
| Apigenin                                              | 0.21 | HPLC                  |
| Bacosine                                              | 2    | HPLC                  |
| Beta sitosterol D glucosides                          | 0.36 | HPTLC                 |
| other bacosides                                       | 12.9 | HPLC ( as bacoside A) |

**Supplementary table:** HPLC quantification of the different chemicals present in the *Bacopa monnieri* extract, related to method details test substance.
